# Supplementary material for: Salicylaldimine-functionalized l-phenylalanine-based pseudopeptides: zinc-instructed conformational tuning of self-assembled nanostructures
Source: Royal Society of Chemistry journal article supplement (doi:10.1039/d4lf00251b), 2024-10-21
Supplement: d4lf00251b1.pdf [file d4lf00251b1.pdf]

## Electronic Supporting Information

# Salicylalimine functionalized L-phenylalanine-based pseudopeptides: Zinc-instructed conformational tuning of self-assembled nanostructure

Kamlesh Kumar Nigam, Surabhi Asthana and Mrituanjay D. Pandey\*

Department of Chemistry, Institute of Science, Banaras Hindu University, Varanasi-221005,  
India. E-mail: [mdpandey.chem@bhu.ac.in](mailto:mdpandey.chem@bhu.ac.in)

### Content:

|                                                                                                                            |     |
|----------------------------------------------------------------------------------------------------------------------------|-----|
| <b>Fig. S1</b> <sup>1</sup> H & <b>S2</b> <sup>13</sup> C NMR spectra of <b>1</b> .....                                    | S3  |
| <b>Fig. S3</b> HRMS spectra of <b>1</b> & <b>S4</b> <sup>1</sup> H NMR spectra of <b>2</b> .....                           | S4  |
| <b>Fig. S5</b> <sup>13</sup> C NMR spectra of <b>2</b> & <b>S6</b> HRMS spectra of <b>2</b> .....                          | S5  |
| <b>Fig. S7</b> <sup>1</sup> H & <b>S8</b> <sup>13</sup> C NMR spectra of <b>3</b> .....                                    | S6  |
| <b>Fig. S9</b> HRMS spectra of <b>3</b> , <b>S10</b> Absorption spectra, & <b>S11</b> Fluorescence life time plot.....     | S7  |
| <b>Fig. S12</b> Photograph (colorimetric study) & <b>S13</b> Proposed PET mechanism.....                                   | S8  |
| <b>Fig. S14</b> Reversibility plot, <b>S15</b> Reversibility model & <b>S16</b> Interference graph.....                    | S9  |
| <b>Fig. S17</b> Job's plot, <b>S18</b> HRMS spectra of <b>2</b> -Zn(II) & <b>S19</b> Thordarson's plot.....                | S10 |
| <b>Fig. S20</b> Sensitivity plot, <b>S21</b> LOD & <b>S22</b> BSA Titration spectra.....                                   | S11 |
| <b>Fig. S23</b> CD, <b>S24</b> TEM image & <b>S25</b> AFM image with histogram plot.....                                   | S12 |
| <b>Fig. S26</b> proposed self-assembly model for <b>2</b> & <b>S27</b> AFM image with histogram plot for<br><b>3</b> ..... | S13 |
| <b>Fig. S28</b> Proposed AFM model for <b>3</b> & <b>S29</b> DLS graph.....                                                | S14 |

|                                                                                                              |     |
|--------------------------------------------------------------------------------------------------------------|-----|
| <b>Fig. S30</b> IR deconvolution graph, .....                                                                | S15 |
| <b>Fig. S31</b> DFT optimised structure & <b>S32</b> DFT optimised energy level diagram of <b>2</b><br>..... | S16 |
| <b>Fig. S33</b> DFT optimised energy level diagram of <b>3</b> .....                                         | S17 |
| <b>Table S1</b> Quantum yield & <b>S2</b> fluorescence decay parameters of <b>1-3</b> .....                  | S17 |
| <b>Table S3</b> Comparative LOD of <b>1-3</b> .....                                                          | S18 |

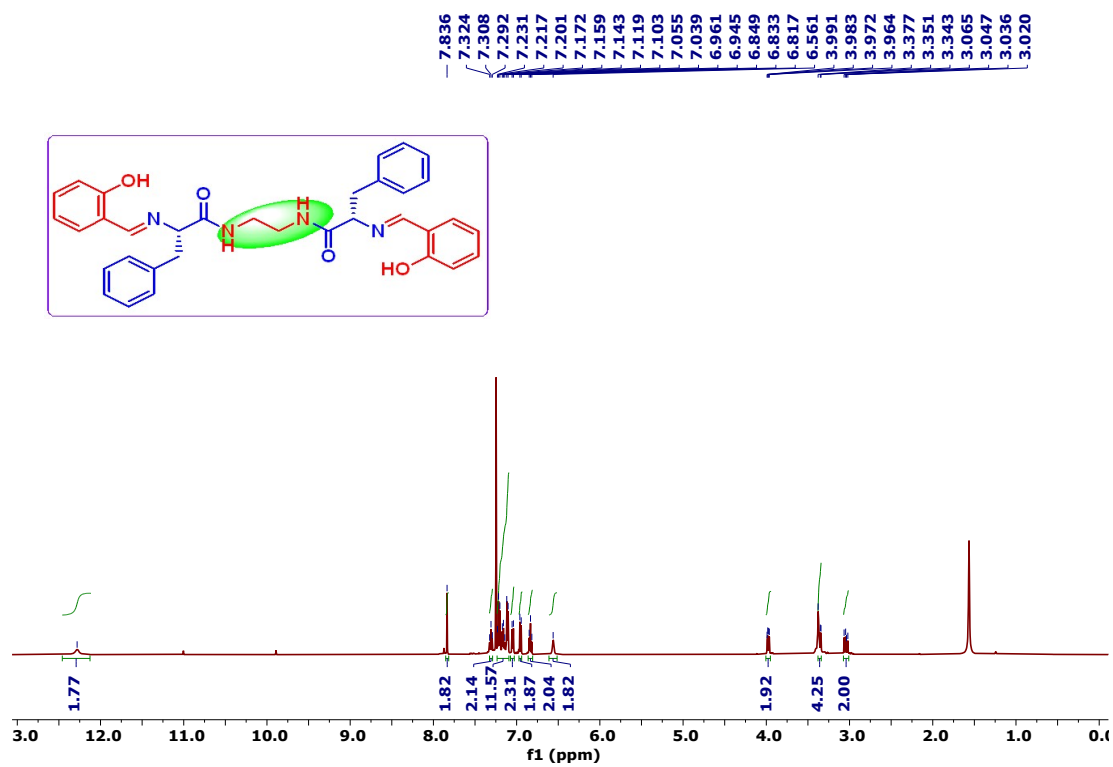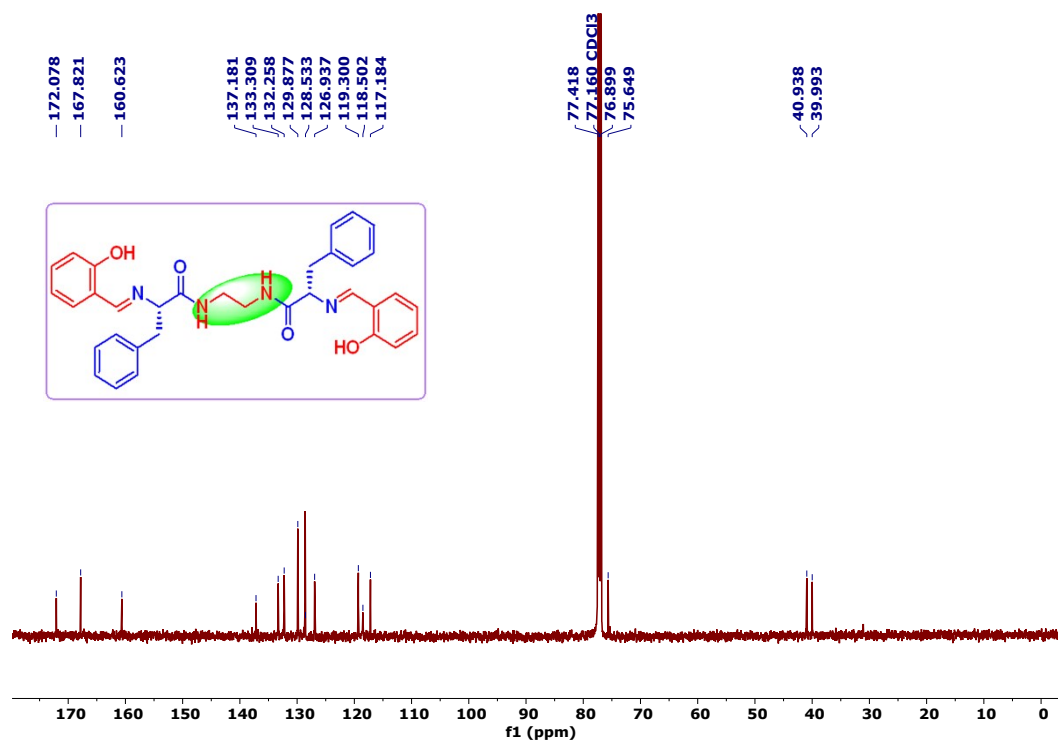

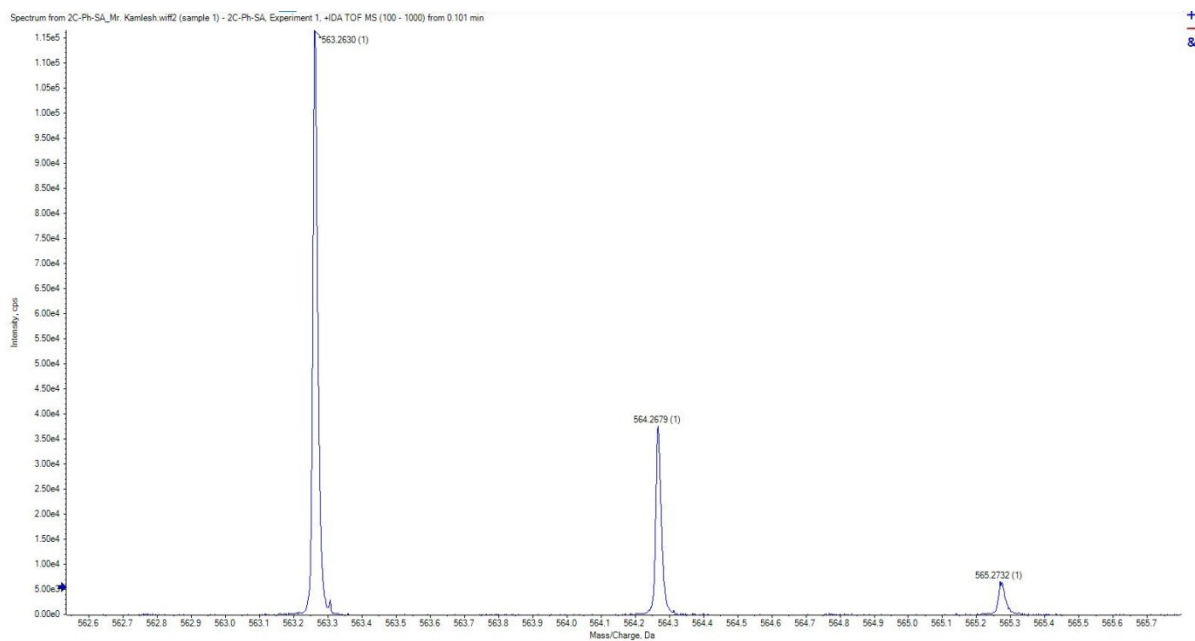

Figure. S3 HRMS data of 1

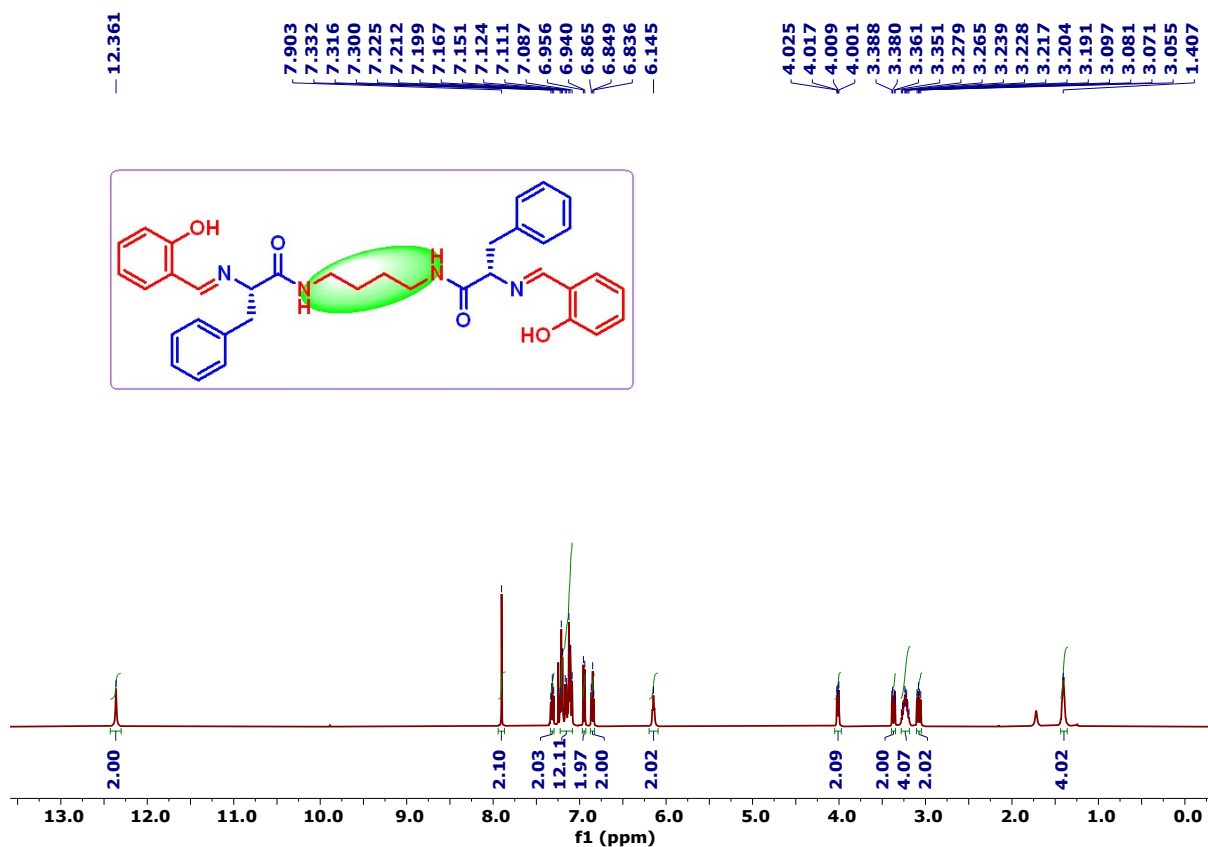

Figure. S4  $^1\text{H}$  NMR (500 MHz,  $\text{CDCl}_3$ ) of 2

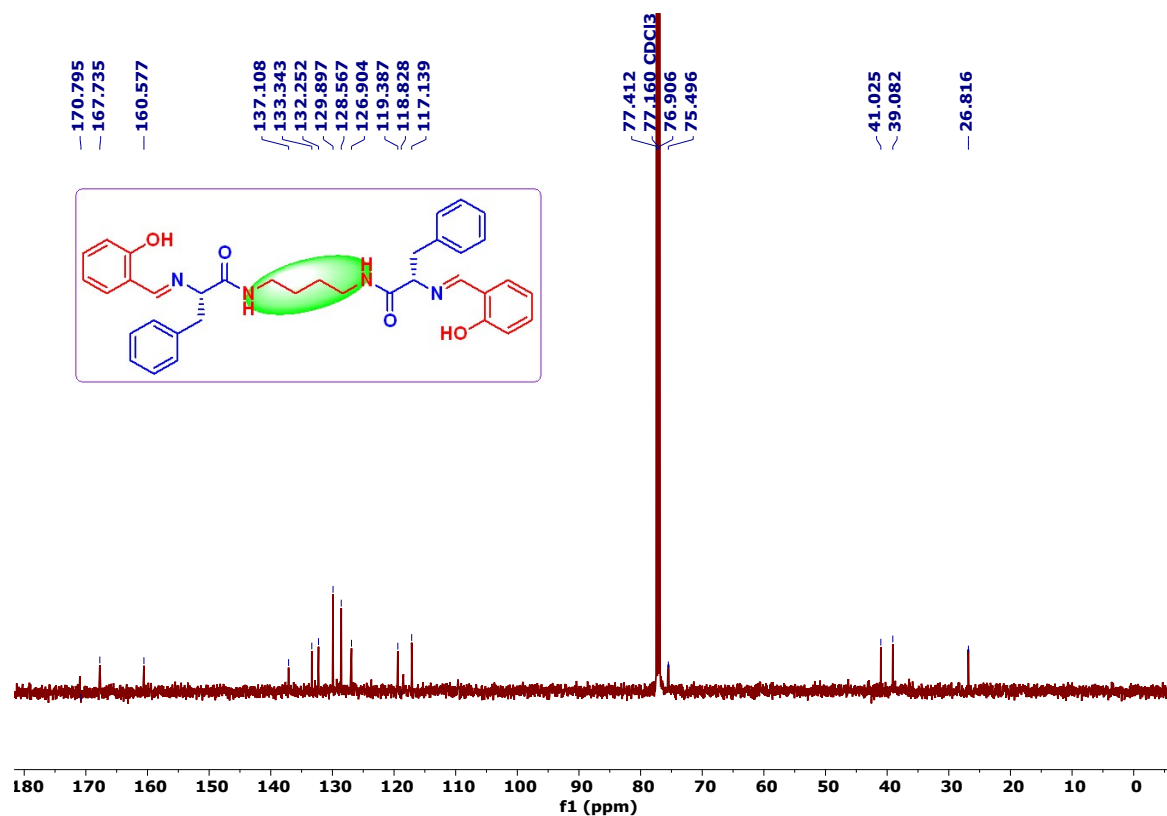

Figure. S5  $^{13}\text{C}\{^1\text{H}\}$  NMR (126 MHz,  $\text{CDCl}_3$ ) of 2

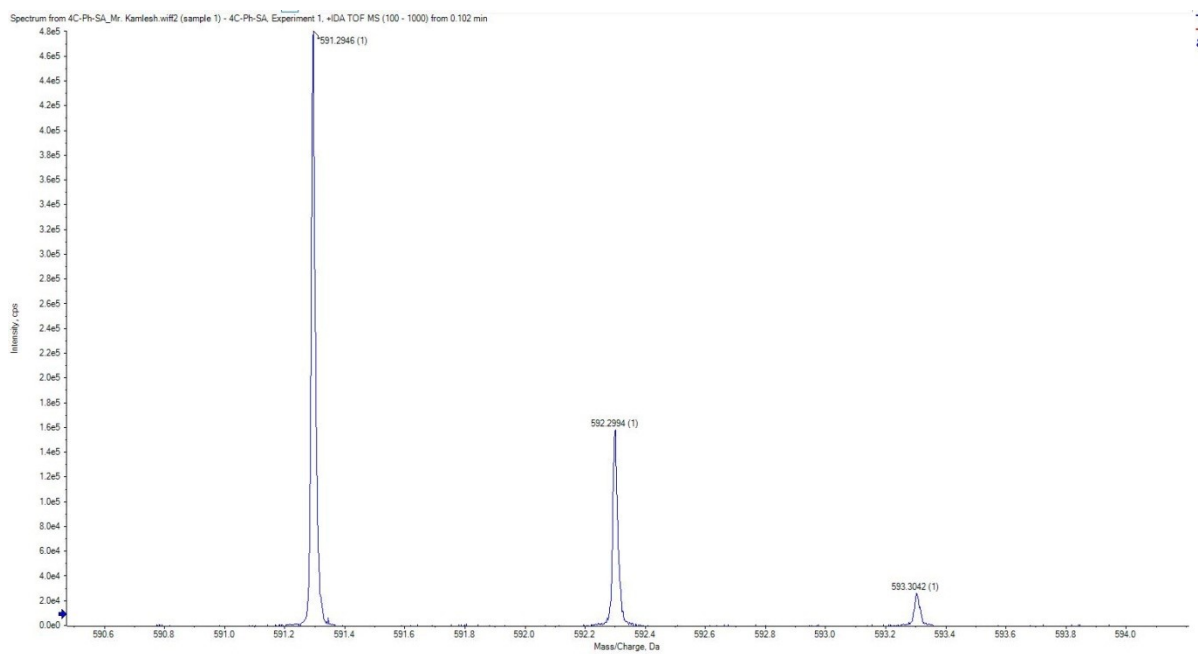

Figure. S6 HRMS data of 2

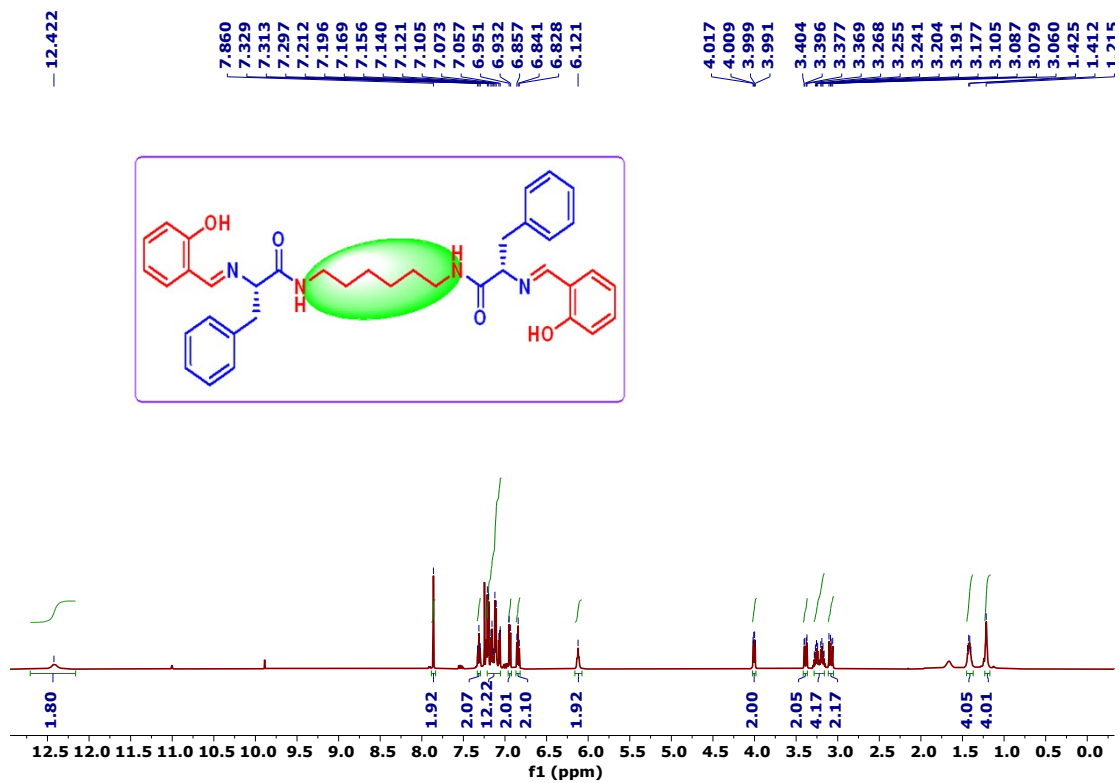

Figure. S7  $^1\text{H}$  NMR (500 MHz,  $\text{CDCl}_3$ ) of 3

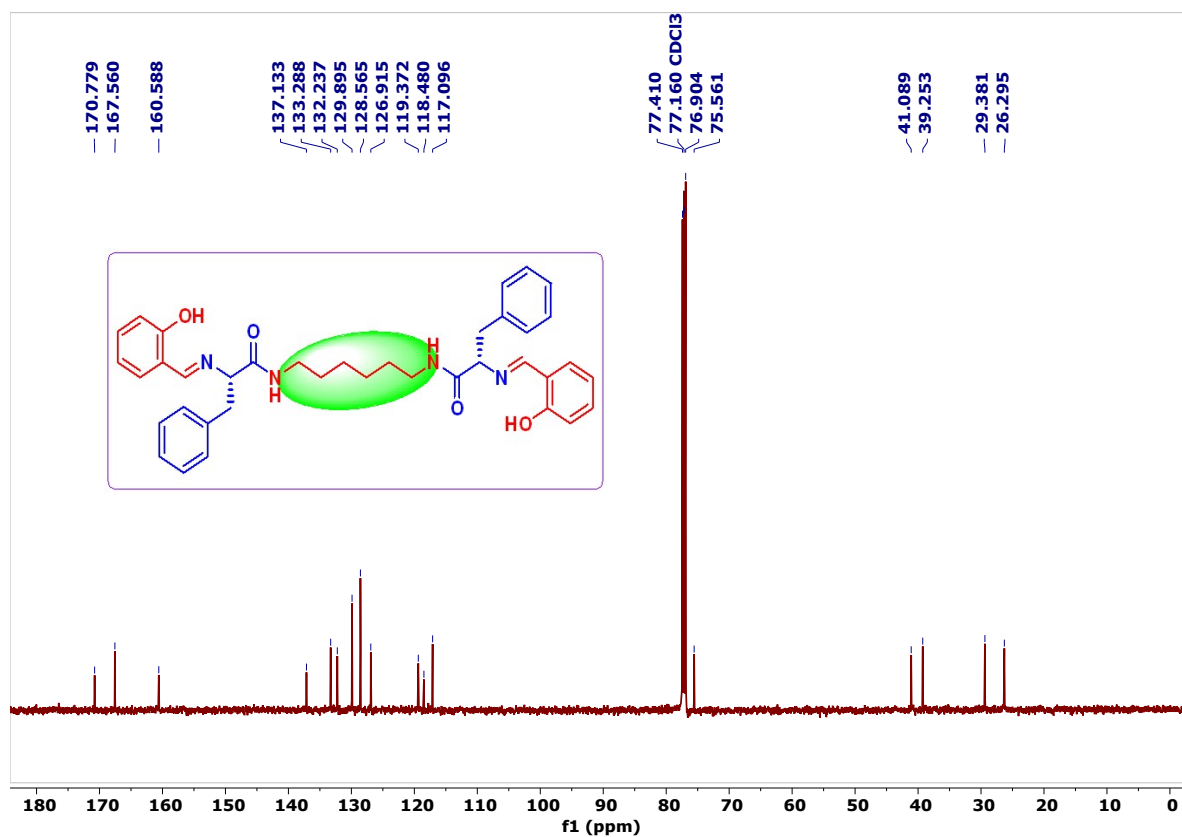

Figure. S8  $^{13}\text{C}\{^1\text{H}\}$  NMR (126 MHz,  $\text{CDCl}_3$ ) of 3

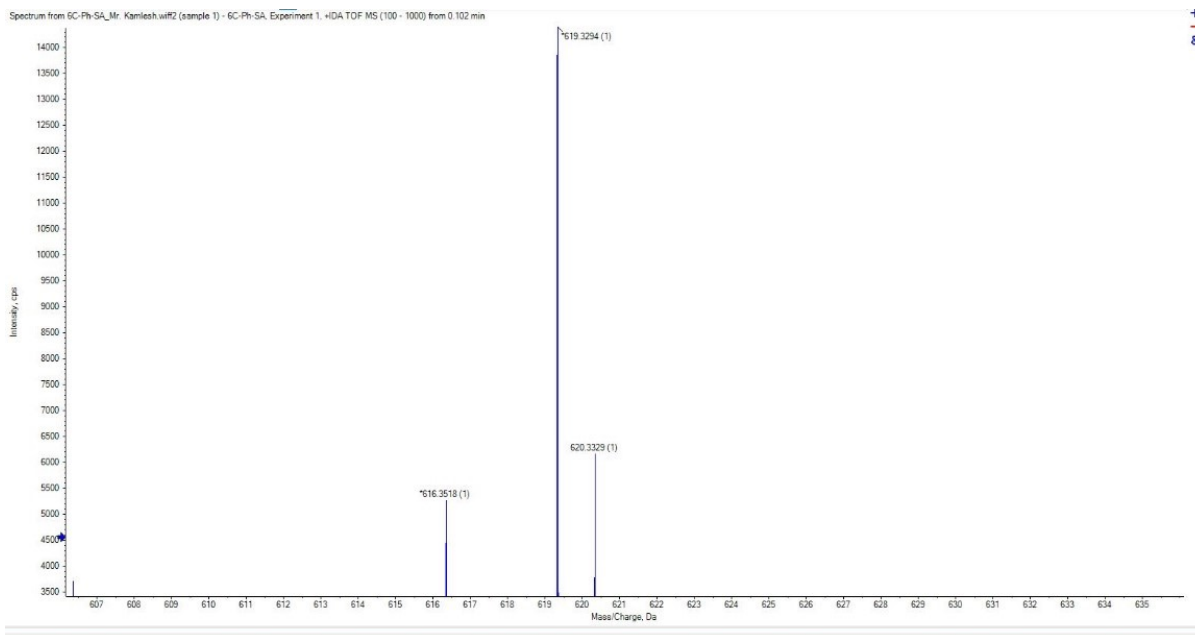

Figure. S9 HRMS data of 3

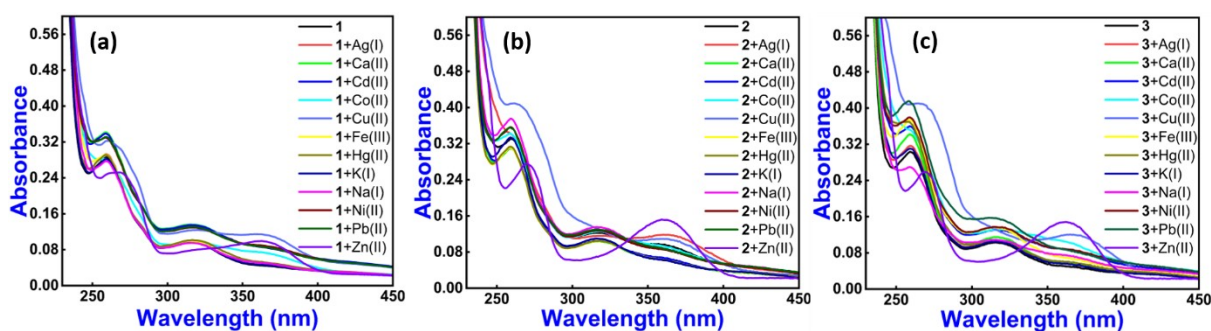

Figure S10 Absorption spectrum of 1 (a), 2 (b) and 3 (c) with various metal ions in HEPES buffer (Ethanol:Water = 3:7 v/v, pH ~ 7.4; 10  $\mu$ M; at r.t.)

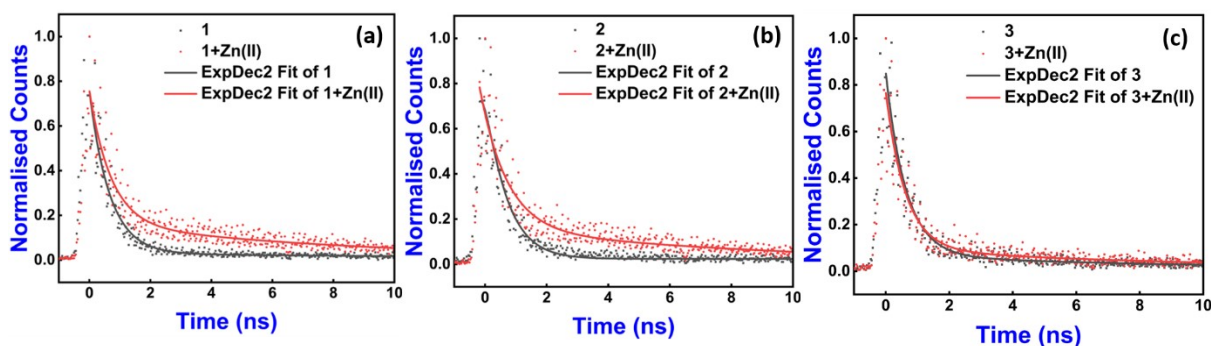

Figure. S11 Fluorescence life time decay curve of 1(a), 2(b), and 3(c) with Zn(II) ions.

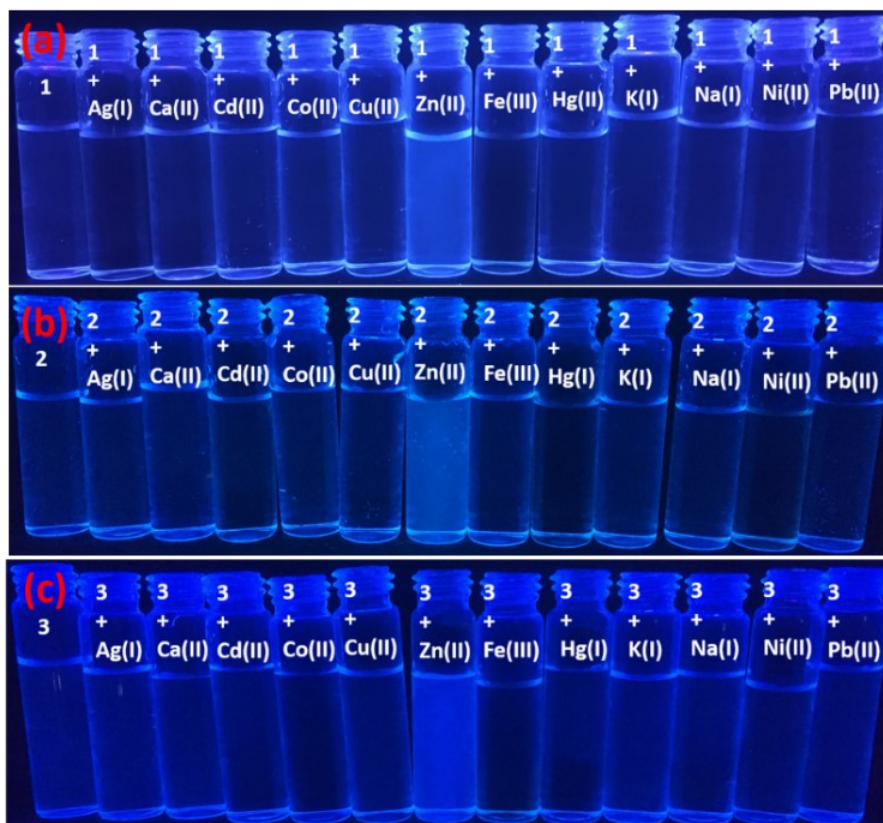

**Figure. S12** Photographs of **1(a)**, **2(b)**, and **3(c)** interacting with metal ions under 365 nm UV light illumination.

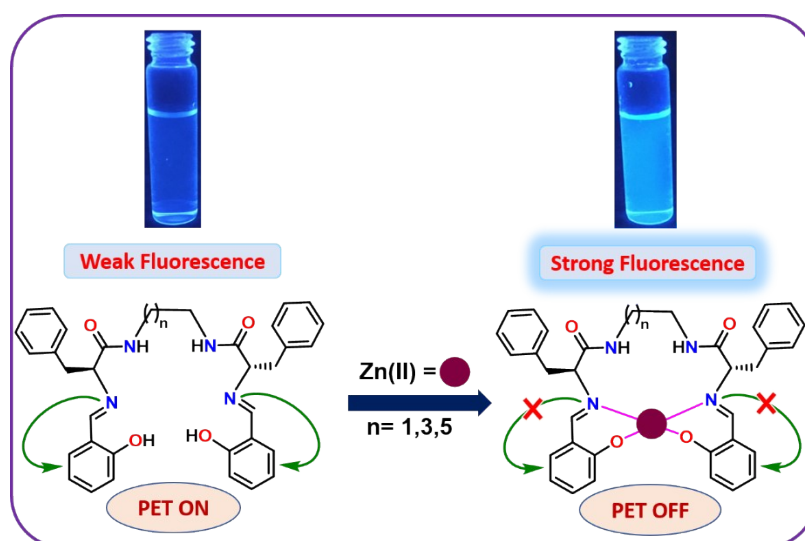

**Figure S13.** Proposed PET mechanism of **1-3** with Zn(II) ion.



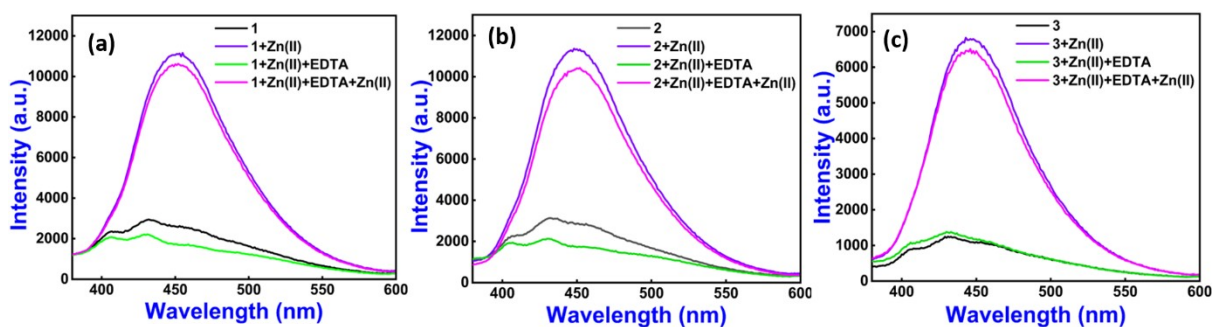

**Figure S14.** Reversibility study of 1-Zn(II) (a), 2-Zn(II) (b), and 3-Zn(II) (b) complex with EDTA.

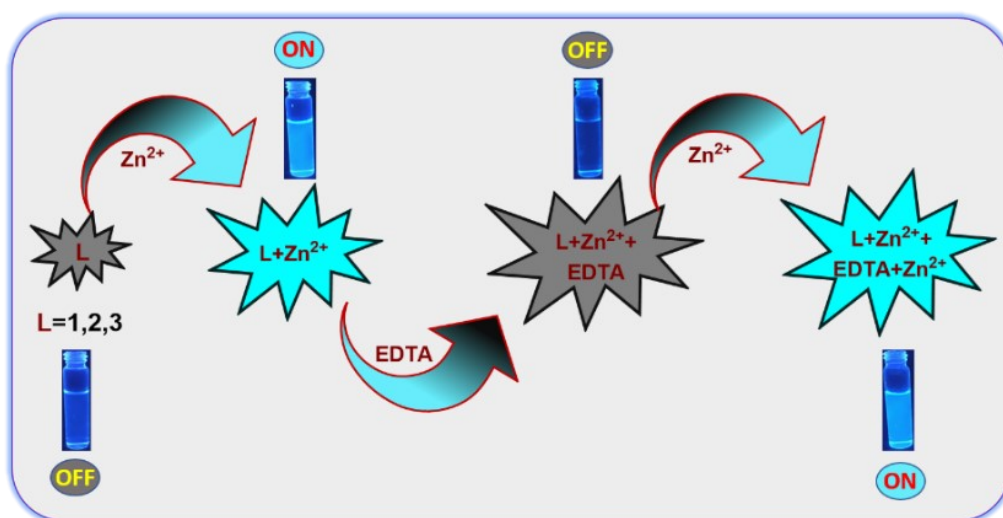

**Figure S15.** Proposed scheme of reversibility for 1-3

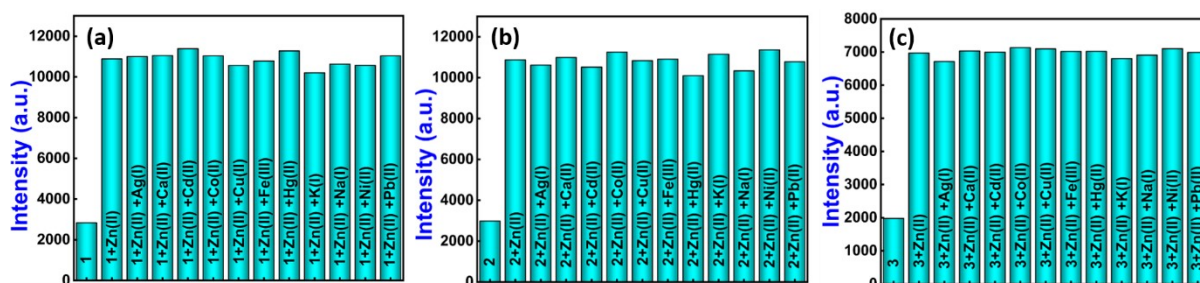

**Figure S16.** Interference experiments of 1-Zn(II) (a), 2-Zn(II) (b), and 3-Zn(II) (c) complex with other competitive metal ions at room temperature.

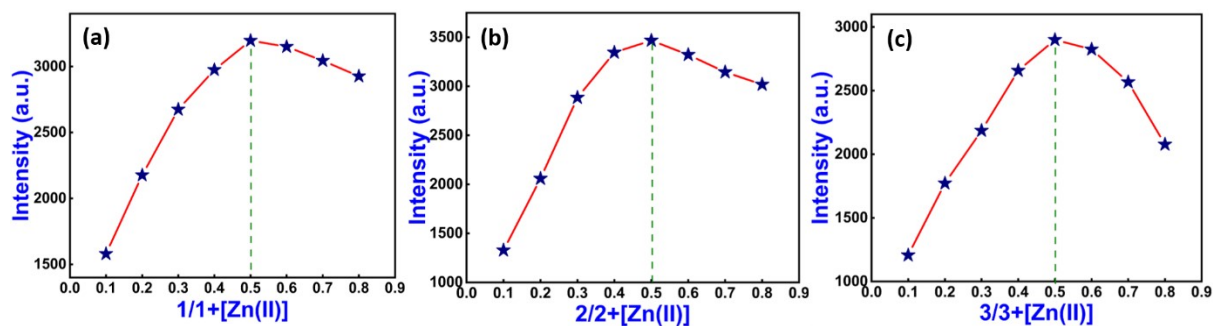

Figure S17. Jobs plot of 1-Zn(II) (a), 2-Zn(II) (b), and 3-Zn(II) (c) complex.

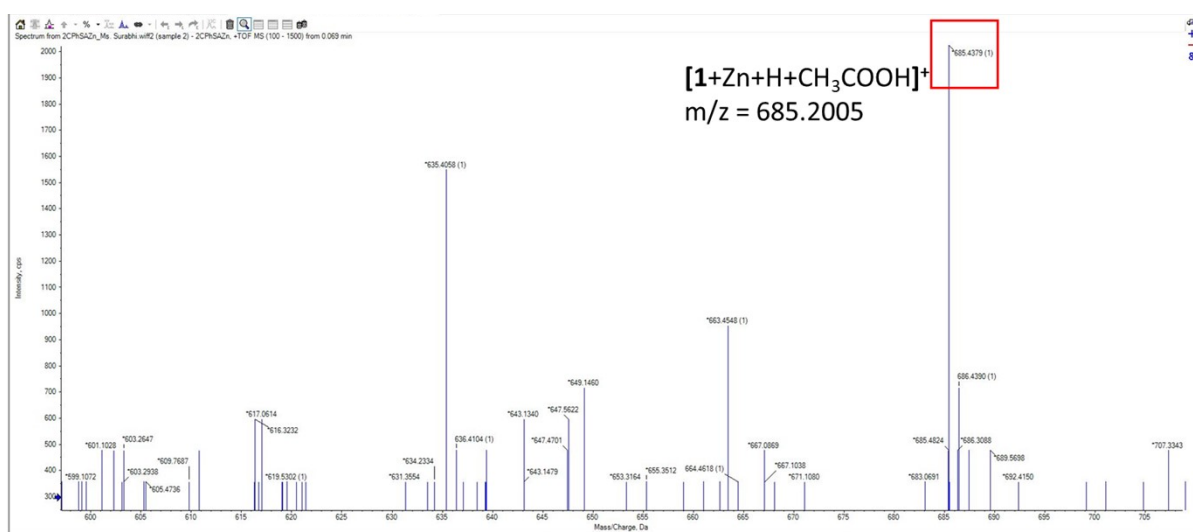

Figure S18. HRMS data of 1-Zn(II)

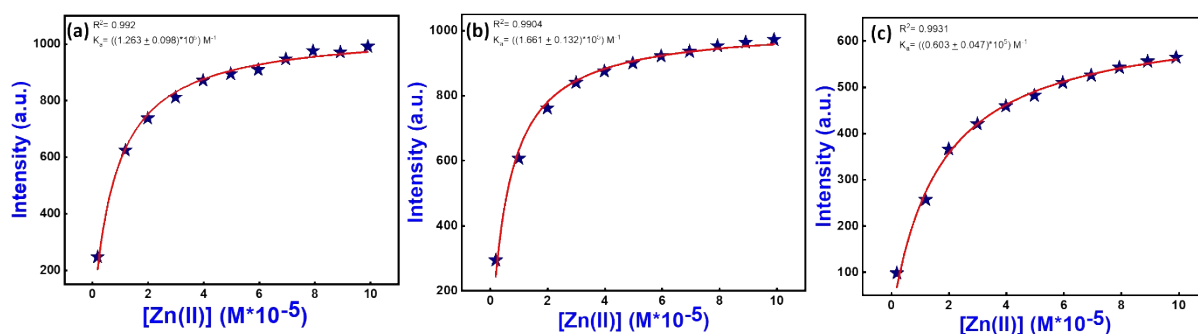

Figure S19. Binding isotherm plots of 1-Zn(II) (a), 2-Zn(II) (b), and 3-Zn(II) (c).

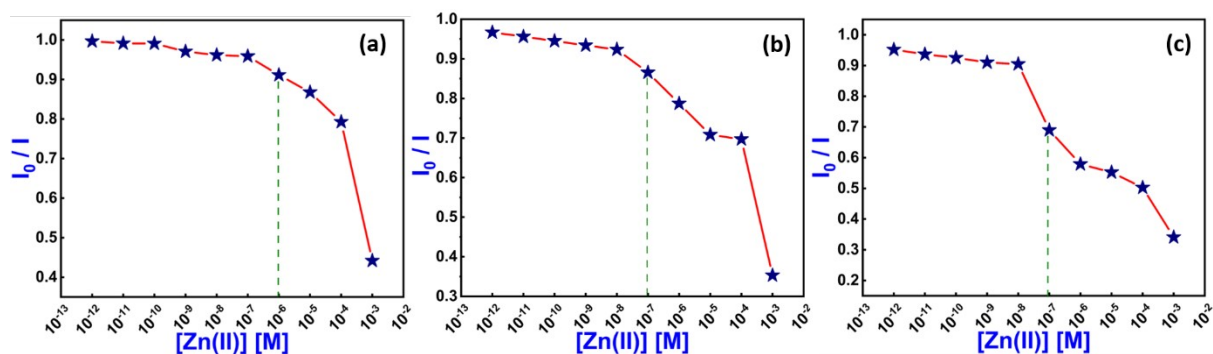

**Figure S20.** Sensitivity plots of **1(a)**, **2(b)**, and **3(c)** complex with different concentration of Zn(II) ion ( $10^{-2}$  –  $10^{-12}$  M) at room temperature.

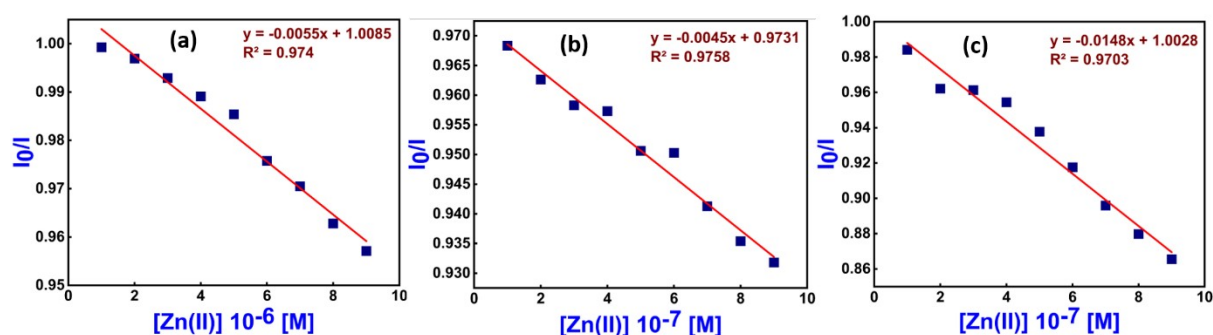

**Figure S21.** LOD plots of **1(a)**, **2(b)**, and **3(c)** with different concentrations of Zn(II) ion. ( $1 \times 10^{-6}$  M to  $9 \times 10^{-6}$  M for **1** and  $1 \times 10^{-7}$  M to  $9 \times 10^{-7}$  M for both **2** and **3** via; fluorescence spectra).

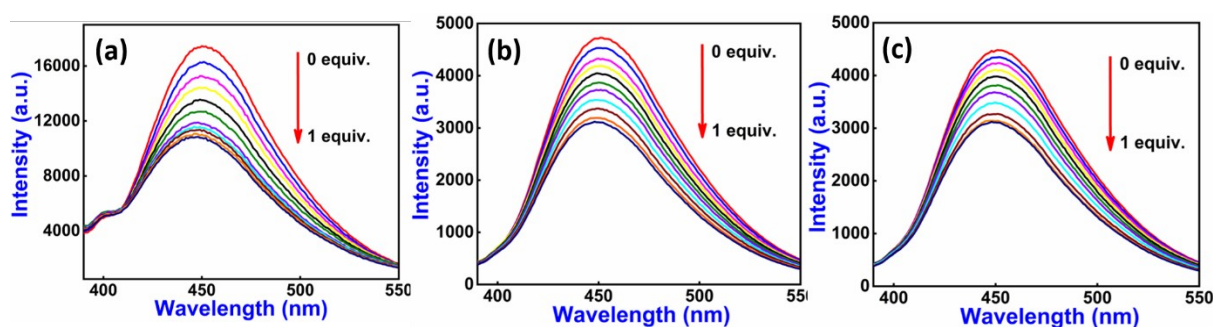

**Figure S22.** Emission titration spectrum of **1-Zn(II)** (a), **2-Zn(II)** (b), and **3-Zn(II)** (c) with BSA (0 to 1 equiv.) in HEPES buffer (Ethanol:Water = 3:7 v/v, pH ~ 7.4; at r.t.)

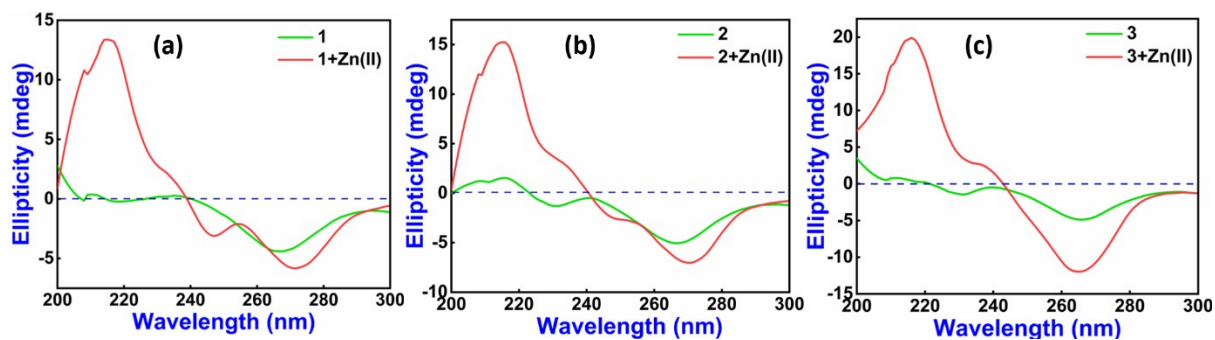

**Figure S23.** CD spectra of **1**(a), **2**(b), and **3**(b) with Zn(II) ion recorded in Ethanol:Water = 3:7 v/v, 10 $\mu$ M; at r.t.

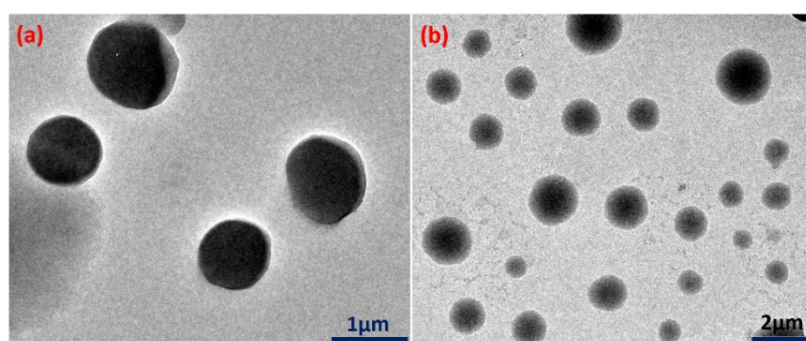

**Figure S24.** TEM image **1** (a) and **1-Zn(II)** complex (b)

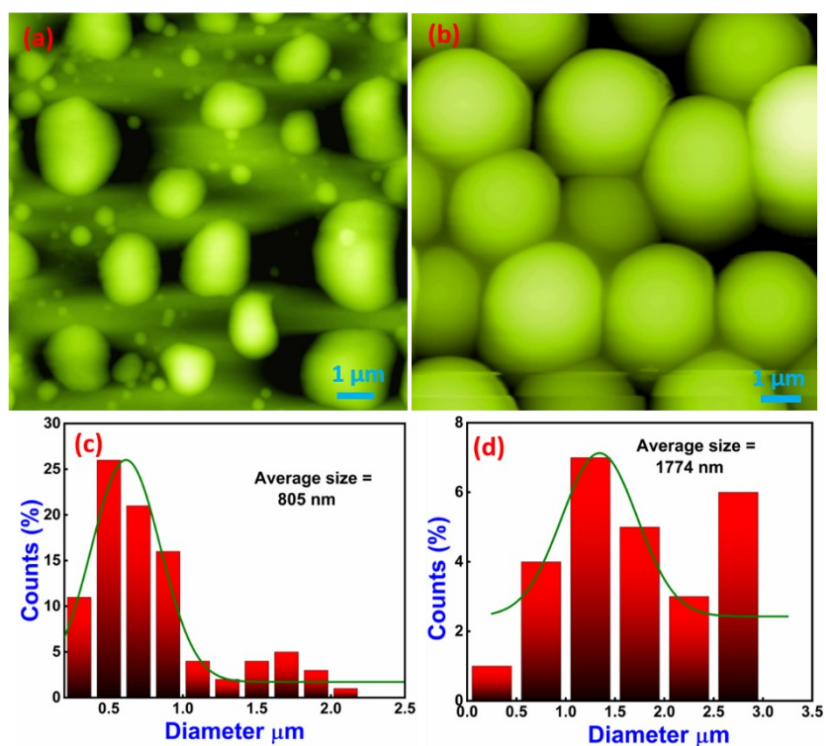

**Figure S25.** (a) 2D AFM images of self-assembled structure for **2**, (c) its corresponding particle (Spherical) size distribution histogram, (b) 2D AFM images of self-assembled structure for **1-Zn(II)** complex, (d) its corresponding particle (Spherical) size distribution histogram.

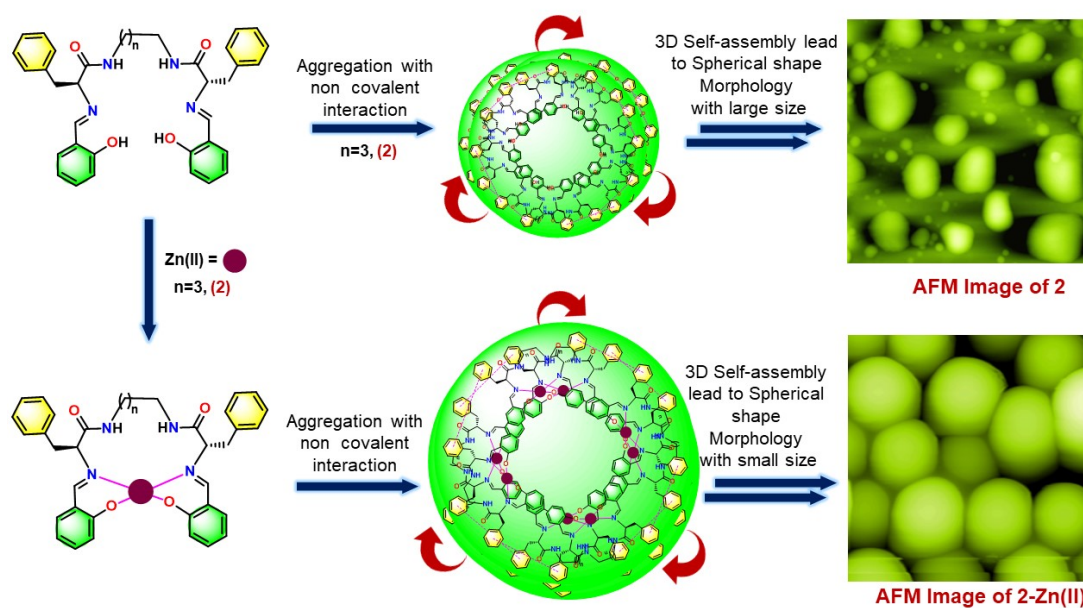

**Figure S26.** Proposed model to represent the change in structural morphology of **2** by adding Zn(II) ions via 2D AFM image.

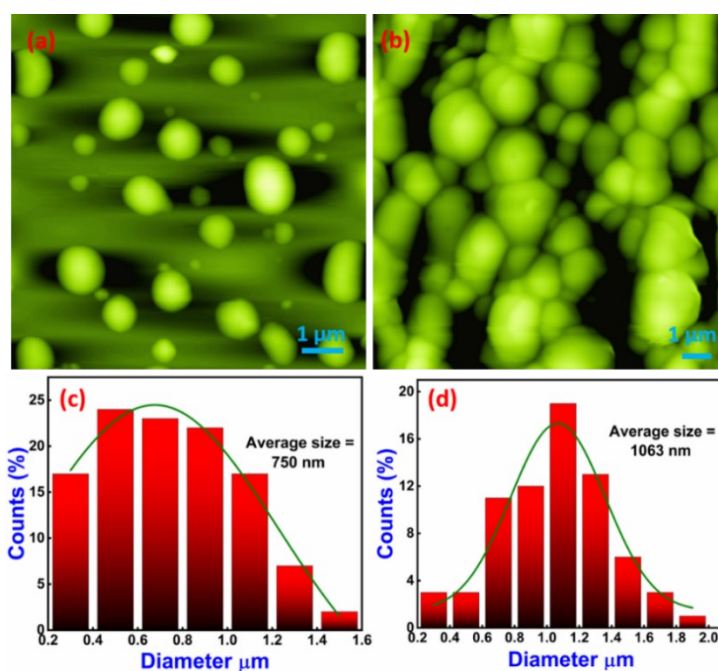

**Figure S27.** (a) 2D AFM images of self-assembled structure for **3**, (c) its corresponding particle (Spherical) size distribution histogram, (b) 2D AFM images of self-assembled structure for **3-Zn(II)** complex, (d) its corresponding particle (Spherical) size distribution histogram.

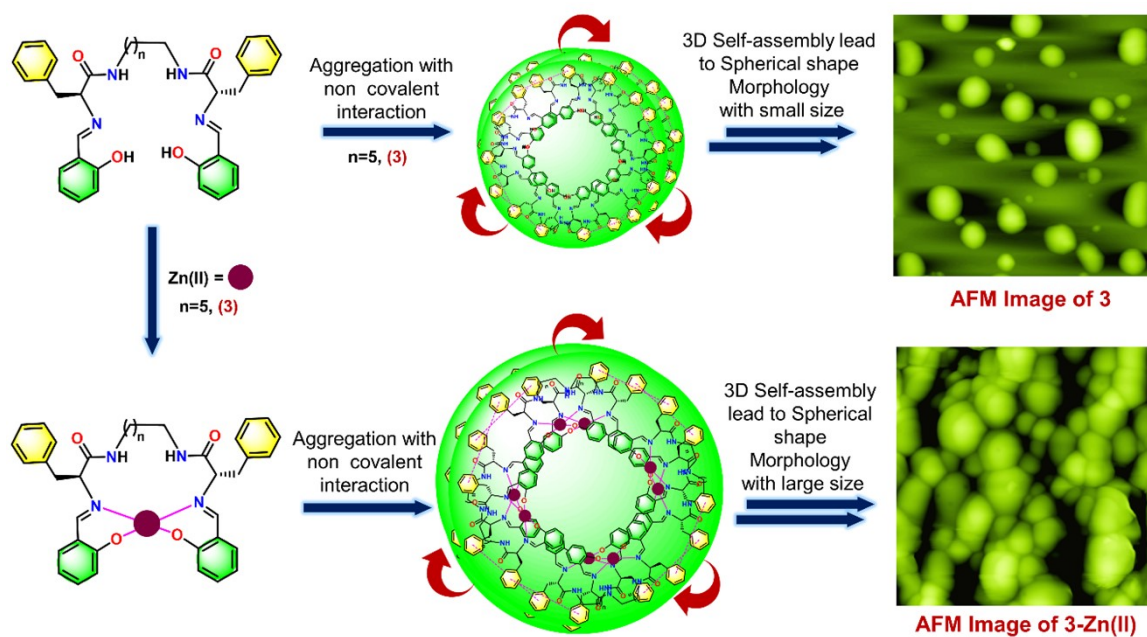

**Figure S28.** Proposed model to represent the change in structural morphology of **3** by adding Zn(II) ions via 2D AFM image.

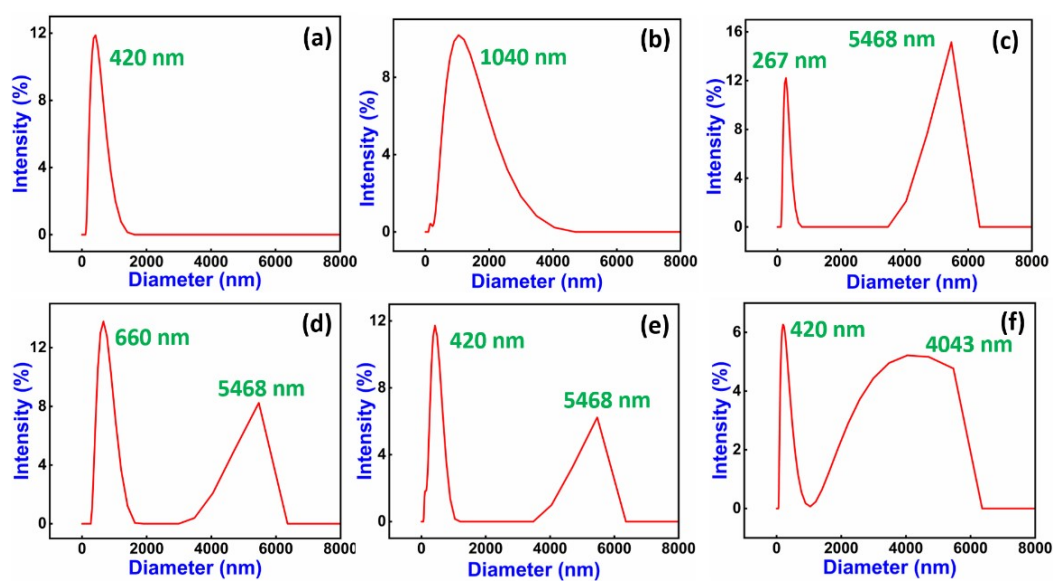

**Figure S29.** The particle size distribution analyzed through Dynamic Light Scattering (DLS) spectra for compounds **1** (a), **2** (b), **3** (c) and its complex **1-Zn(II)** (d), **2-Zn(II)** (e), **3-Zn(II)** (f) in a solution of Ethanol:Water at a ratio of 3:7 v/v (10 $\mu$ M).

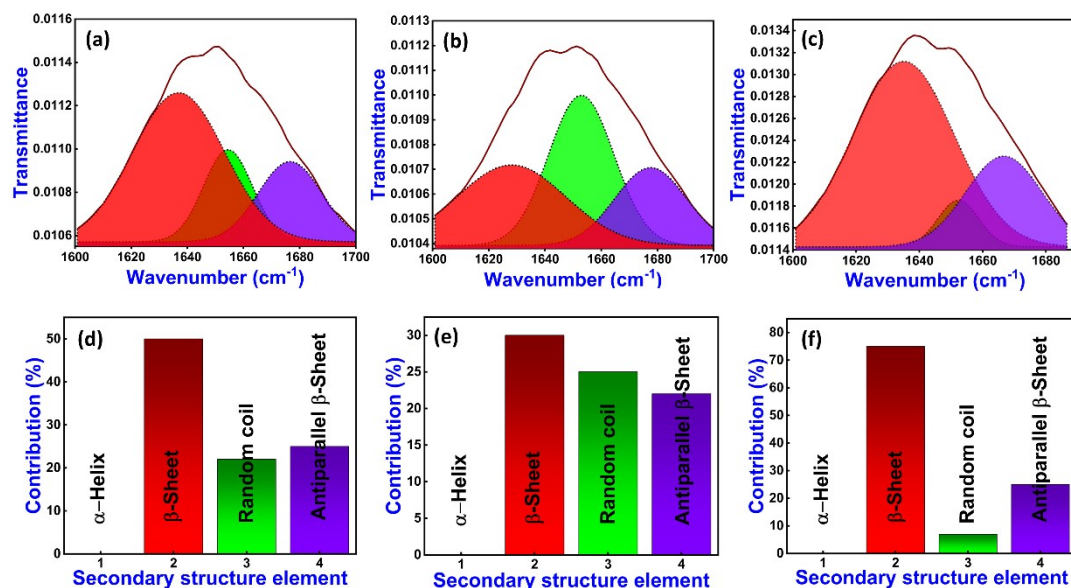

**Figure S30.** (a) The FT-IR spectrum of **1-Zn(II)** (solid brown line) and its deconvolution (dashed colorful area), (d) Secondary structure contributions of **1-Zn(II)** in self-assembly, (b) The FT-IR spectrum of **2-Zn(II)** (solid brown line) and its deconvolution (dashed colorful area), (e) Secondary structure contributions of **2-Zn(II)** in self-assembly. (c) The FT-IR spectrum of **3-Zn(II)** (solid brown line) and its deconvolution (dashed colorful area), (f) Secondary structure contributions of **3-Zn(II)** in self-assembly. Fitting of deconvolution plot by multiple Gaussian peaks in the amide region ranging from 1600 to 1700 cm<sup>-1</sup>.

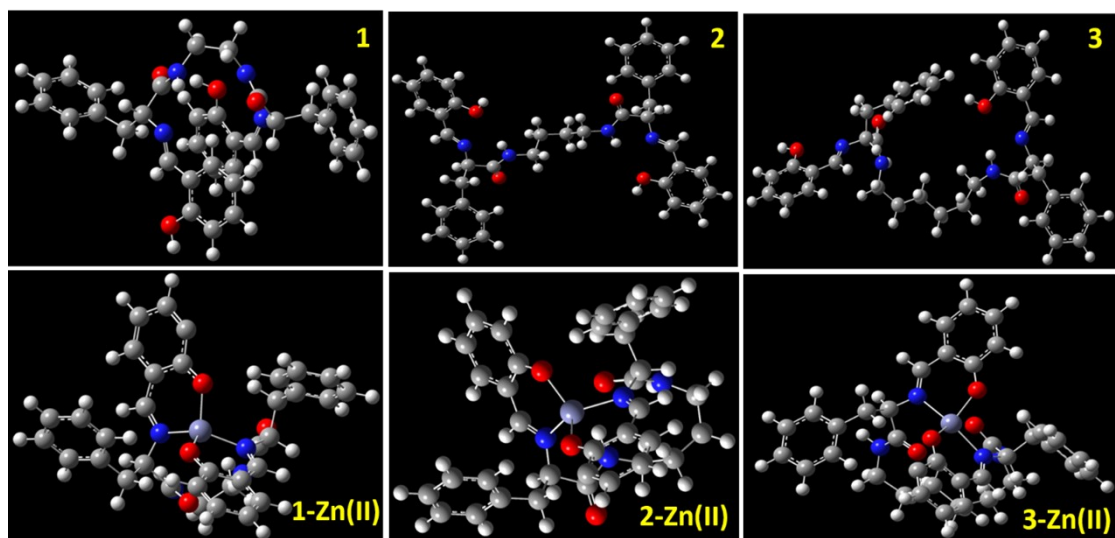

Figure

e S31. DFT- optimized structure of 1-3 and its complex 1-3-Zn(II))

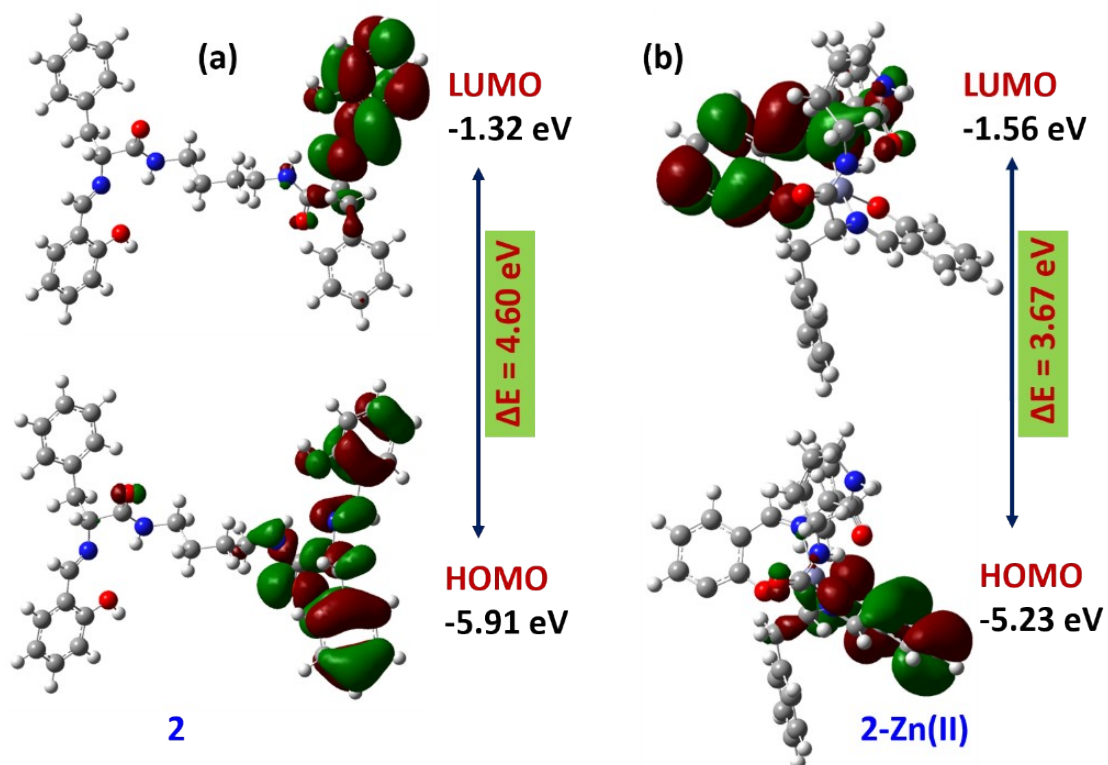

Figure S32. Optimized energy level and energy gap between HOMO-LUMO of 2 (a) and 2-Zn(II) complex (b)



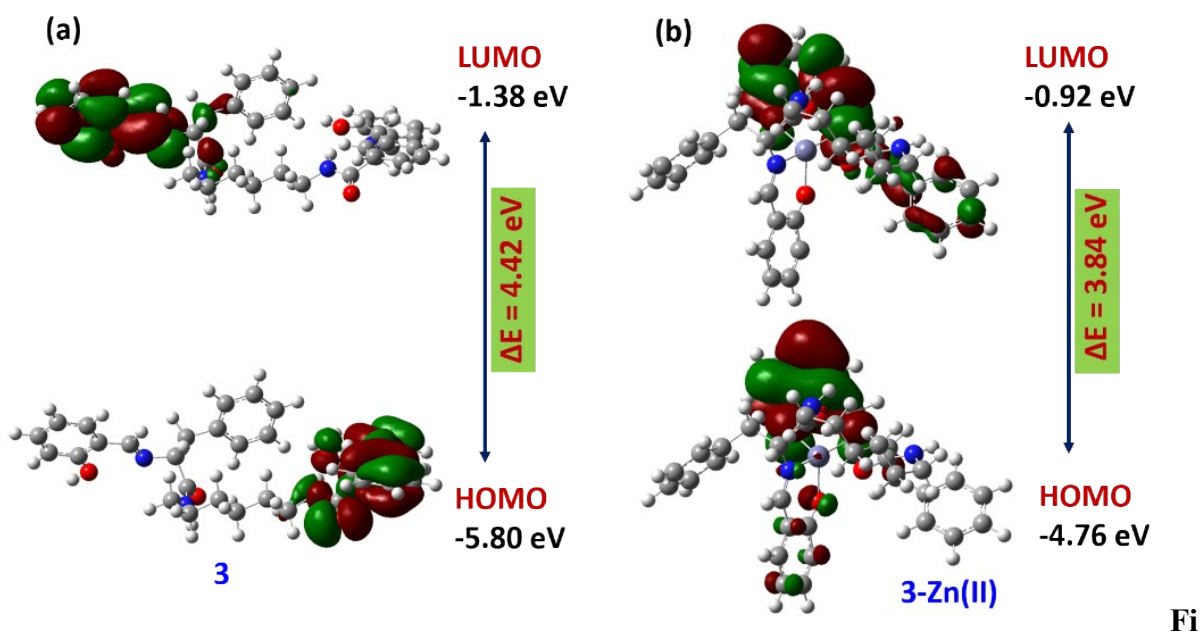

Figure S33. Optimized energy level and energy gap between HOMO-LUMO of 3 (a) and 3-Zn(II) complex (b).

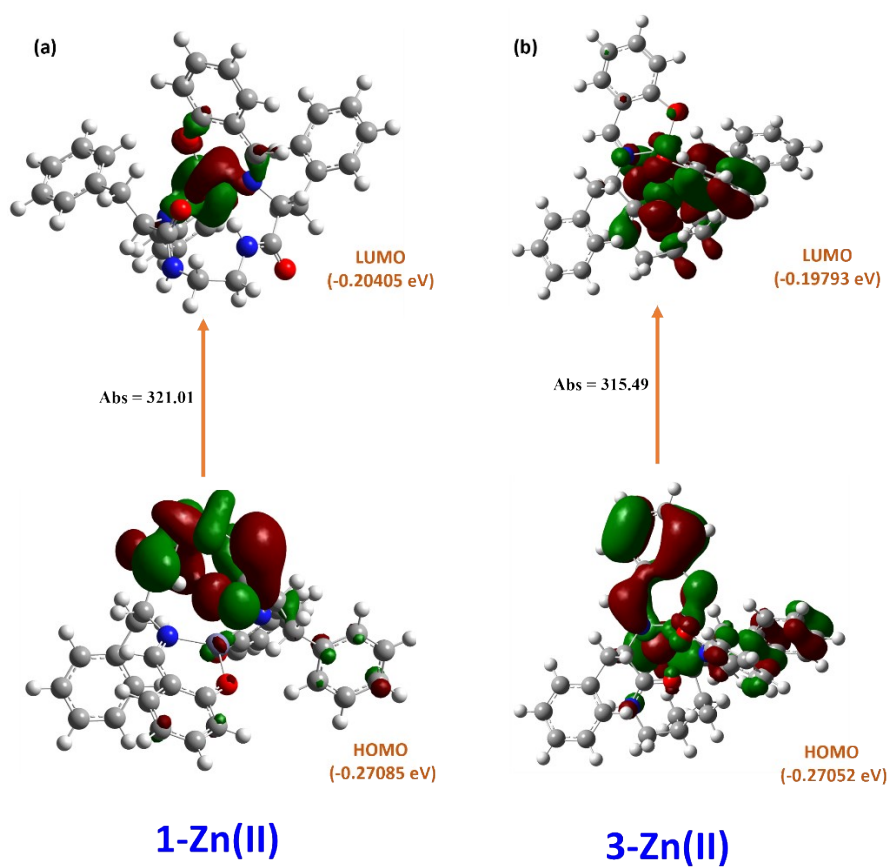

Figure S34. Representation of HOMO-LUMO of 1-Zn (II) (a) and 3-Zn (II) (b) complexes by TD-DFT.

**Table S1** Quantum yield of neat **1-3** and its complex (**1-3-Zn(II)**)

| S.No | Entry    | Quantum yield |
|------|----------|---------------|
| 1    | 1        | 0.31          |
| 2    | 1-Zn(II) | 0.91          |
| 3    | 2        | 0.24          |
| 4    | 2-Zn(II) | 0.62          |
| 5    | 3        | 0.20          |
| 6    | 3-Zn(II) | 0.33          |

**Table S2** Fluorescence decay parameters of neat **1-3** and its complex (**1-3-Zn(II)**) in HEPES

buffer (Ethanol:Water = 3:7 v/v, pH ~ 7.4; 10 $\mu$ M; at r.t.)

| S.No. | Entry    | (A)                       | $\tau$ (ns)           | $\langle\tau\rangle$ (ns) |
|-------|----------|---------------------------|-----------------------|---------------------------|
| 1     | 1        | 0.73034 (A <sub>1</sub> ) | 0.66225 ( $\tau_1$ )  |                           |
| 2     |          | 0.02759 (A <sub>2</sub> ) | 17.74655 ( $\tau_2$ ) | 1.2840                    |
| 3     | 1-Zn(II) | 0.59336 (A <sub>1</sub> ) | 0.70774 ( $\tau_1$ )  |                           |
| 4     |          | 0.16378 (A <sub>2</sub> ) | 8.64393 ( $\tau_2$ )  | 1.8356                    |
| 5     | 2        | 0.77839 (A <sub>1</sub> ) | 0.67571 ( $\tau_1$ )  |                           |
| 6     |          | 0.12104 (A <sub>2</sub> ) | 0.18469 ( $\tau_2$ )  | 0.6095                    |
| 7     | 2-Zn(II) | 0.51118 (A <sub>1</sub> ) | 0.87242 ( $\tau_1$ )  |                           |
| 8     |          | 0.16355 (A <sub>2</sub> ) | 10.55322 ( $\tau_2$ ) | 3.2187                    |
| 9     | 3        | 0.78198 (A <sub>1</sub> ) | 0.6308 ( $\tau_1$ )   |                           |

|           |                 |                   |                      |        |
|-----------|-----------------|-------------------|----------------------|--------|
| <b>10</b> |                 | 0.05877 ( $A_2$ ) | 7.12217 ( $\tau_2$ ) | 1.0843 |
| <b>11</b> | <b>3-Zn(II)</b> | 0.67029 ( $A_1$ ) | 0.61534 ( $\tau_1$ ) |        |
| <b>12</b> |                 | 0.08508 ( $A_2$ ) | 7.50037 ( $\tau_2$ ) | 1.3908 |

Dynamic parameters determined from  $A_1 \exp(-x/\tau_1) + A_2 \exp(-x/\tau_2) + y_0$

The weighted mean lifetime  $\langle \tau \rangle$  was calculated by using following equation:

$$\langle \tau \rangle = (A_1 \tau_1 + A_2 \tau_2) / (A_1 + A_2)$$

where,  $A_1/A_2$  and  $\tau_1/\tau_2$  are the fractions (A) and lifetimes ( $\tau$ ) respectively.

Solution concentration = 10  $\mu\text{M}$ .

**Table S3** Comparative limit of detection (LOD) of **1-3** with Zn(II) ion.

| S.No. | Sensor   | Mechanism   | LOD                                                       | References       |
|-------|----------|-------------|-----------------------------------------------------------|------------------|
| 1     | <b>1</b> | PET         | $8.30 \times 10^{-6} \text{ M}$ or (8.30 $\mu\text{M}$ )  | <b>This work</b> |
|       | <b>2</b> | PET         | $8.28 \times 10^{-7} \text{ M}$ or (0.828 $\mu\text{M}$ ) |                  |
|       | <b>3</b> | PET         | $8.34 \times 10^{-7} \text{ M}$ or (0.834 $\mu\text{M}$ ) |                  |
| 2     | 4        | -           | $1.1 \times 10^{-5} \text{ M}$ or 11 $\mu\text{M}$        | 1                |
| 3     | 5        | -           | 5.1 $\mu\text{M}$                                         | 2                |
| 4     | 6        | PET         | 1.2 $\mu\text{M}$                                         | 3                |
| 5     | 7        | radiometric | 2.82 $\mu\text{M}$                                        | 4                |
| 6     | 8        | ICT         | 1.24 $\mu\text{M}$ , 0.85 $\mu\text{M}$                   | 5                |
| 7     | 9        | -           | 1.2 $\mu\text{M}$                                         | 6                |

## Materials and instruments

Z-L-Phenylalanine procured from SRL and N-Hydroxysuccinimide procured from Avra, while salicylaldehyde, DCC, HBr\ Acetic Acid, and all aliphatic spacer including, Ethylene diamine, 1,4 Diaminobutane and Hexamethylenediamine were procured from Sigma-Aldrich,

India. Various metal salts including,  $\text{AgNO}_3$ ,  $\text{Ca}(\text{NO}_3)_2 \cdot 4\text{H}_2\text{O}$ ,  $\text{Cd}(\text{NO}_3)_2 \cdot 4\text{H}_2\text{O}$ ,  $\text{Co}(\text{NO}_3)_2 \cdot 6\text{H}_2\text{O}$ ,  $\text{Cu}(\text{NO}_3)_2 \cdot 3\text{H}_2\text{O}$ ,  $\text{Fe}(\text{NO}_3)_3 \cdot 9\text{H}_2\text{O}$ ,  $\text{Hg}(\text{NO}_3)_2$ ,  $\text{KNO}_3$ ,  $\text{NaNO}_3$ ,  $\text{Ni}(\text{NO}_3)_2 \cdot 6\text{H}_2\text{O}$ ,  $\text{Pb}(\text{NO}_3)_2$ , and  $\text{Zn}(\text{NO}_3)_2$  were procured from Himedia.

$^1\text{H}$ -NMR spectra frequency at 500 MHz and  $^{13}\text{C}$ -NMR spectra frequency at 126 MHz were performed on a JEOL 500 FT-NMR. Absorption (UV-Visible) spectra were performed on Agilent Cary 60 UV-Visible with serial no.-MY19329220 single beam UV-Visible spectrometer and fluorescence spectra were performed on Fluoromax<sup>+</sup> spectrofluorometer at room temperature with a 10 mm quartz cell. While Mass spectra were recorded on SCIEX X500R (QTOF-MS) mass spectrometer. AFM measurements were performed on NT-MDT, with model no. Solver next. Circular Dichroism (CD) spectra were recorded by JASCO J-1500-450 with serial no. D062161638, power A C 220V 50/60HZ 770VA and all spectral data of **1-3** were carried out at room temperature in the range 200-300 nm by using a quartz cuvette (4ml path length, 1cm) and samples were prepared in ethanol with a concentration of 10 $\mu\text{M}$ . Dynamic light scattering (DLS) study was performed on Zetasizer Ultra (ZSU5700). Transmission Electron Microscopy (TEM) analysis was recorded on TECNAI 20G2 with 200KV accelerating voltage.

### **General method for absorption and emission measurement:**

Stock solution of **1-3** (10  $\mu\text{M}$ ), was prepared in HEPES buffer (Ethanol:Water = 3:7 v/v, pH ~ 7.4; 10 $\mu\text{M}$ ; at r.t.) for the optical measurement at room temperature with quartz cuvette (4ml, path length, 1cm). Various metal ion (nitrates salt) solutions (100  $\mu\text{M}$ ) including, Ag(I), Ca(II), Cd(II), Co(II), Cu(II), Fe(III), Hg(II), K(I), Na(I), Ni(II), Pb(II), and Zn(II) were prepared in doubly-distilled water for metal ion selectivity measurement. In titration measurement, metal ions solution added portion wise in 3.0 ml solution of **1-3** in a quartz cuvette.

## **Bovine Serum Albumin (BSA) solution preparation**

The Bovine Serum Albumin (BSA) stock solution was prepared in HEPES buffer at a pH ~ 7.4. This involved dissolving the appropriate amount of BSA at room temperature and stirring for 1-2 hours. The BSA concentration, determined to be around  $19 \times 10^{-6}$  M (~ 20  $\mu$ M) was established by using absorption spectroscopy. The calculation involved dividing the absorbance at 280 nm by the molar extinction coefficient of BSA ( $\epsilon_{280} = 44,300 \text{ M}^{-1} \text{ cm}^{-1}$ ).<sup>7,8</sup> The stock solution was stored at 4°C and recommended for use within 4-5 days.

### **Deconvolution Process:**

- o Baseline Correction: Ensure accurate peak assignment by removing baseline drift (<https://doi.org/10.1111/j.1745-7270.2007.00320.x>).
- o Smoothing: Reduce noise using smoothing algorithms ([https://doi.org/10.1007/978-1-0716-2930-7\\_15](https://doi.org/10.1007/978-1-0716-2930-7_15)).
- o Curve Fitting: Decompose the amide I band into individual component peaks corresponding to different secondary structures (<https://doi.org/10.1007/s00249-021-01502-y>).
- Peak Assignment: Assign specific peaks to secondary structures based on characteristic absorption frequencies.
- Interpretation of Deconvoluted Spectra
- Peak at 1600-1660  $\text{cm}^{-1}$ : The presence of this peak indicates the presence of  $\beta$ -sheet (<https://doi.org/10.1039/D0NJ01501F>) (<https://doi.org/10.1007/s00249-021-01502-y>).
- Relative Intensity: The intensity of the  $\beta$ -sheet peak relative to other peaks can provide information about the proportion of  $\beta$ -sheet content (<https://doi.org/10.1039/D0NJ01501F>) (<https://doi.org/10.1007/s00249-021-01502-y>).
- A deconvoluted IR spectrum with the amide I band showing several peaks:
- A prominent peak around 1630  $\text{cm}^{-1}$  indicating significant  $\beta$ -sheet content.

- Peaks at other wavelengths (e.g., 1660 cm<sup>-1</sup> and 1670 cm<sup>-1</sup> for antiparallel  $\beta$ -sheet).

This deconvoluted spectrum can be used to quantify the secondary structure composition of the protein.

## Reference

- (1) S. Peng, J. Lv, G. Liu, C. Fan, S. Pu, *Tetrahedron* 2020, **76**, 131618.
- (2) P. S. Kumar, K. P. Elango, *Spectrochim. Acta Part A Mol. Biomol. Spectrosc.* 2020, **241**, 118610.
- (3) H. Kim, J. Kang, K. B. Kim, E. J. Song, C. Kim, *Spectrochim. Acta Part A Mol. Biomol. Spectrosc.* 2014, **118**, 883–887.
- (4) V. V. S. Mummidiwarapu, K. Tabbasum, J. P. Chinta, C. P. Rao, *Dalt. Trans.* 2012, **41**, 1671–1674.
- (5) Y. Hu, Y. Liu, G. Kim, E. J. Jun, K. M. K. Swamy, Y. Kim, S.-J. Kim, J. Yoon, *Dye. Pigment.* 2015, **113**, 372–377.
- (6) H. Xu, R. Miao, Z. Fang, X. Zhong, *Anal. Chim. Acta* 2011, **687**, 82–88.
- (7) A. Ray, B. K. Seth, U. Pal, S. Basu, *Spectrochim. Acta Part A Mol. Biomol. Spectrosc.* 2012, **92**, 164–174.
- (8) E. Alarcón, A. Aspée, M. González-Béjar, A. M. Edwards, E. Lissi, J. C. Scaiano, *Photochem. Photobiol. Sci.* 2010, **9**, 861–869.
